# Supplementary material
Source: PubMed Central journal article supplement (PMC2128632)

**Extra figures**

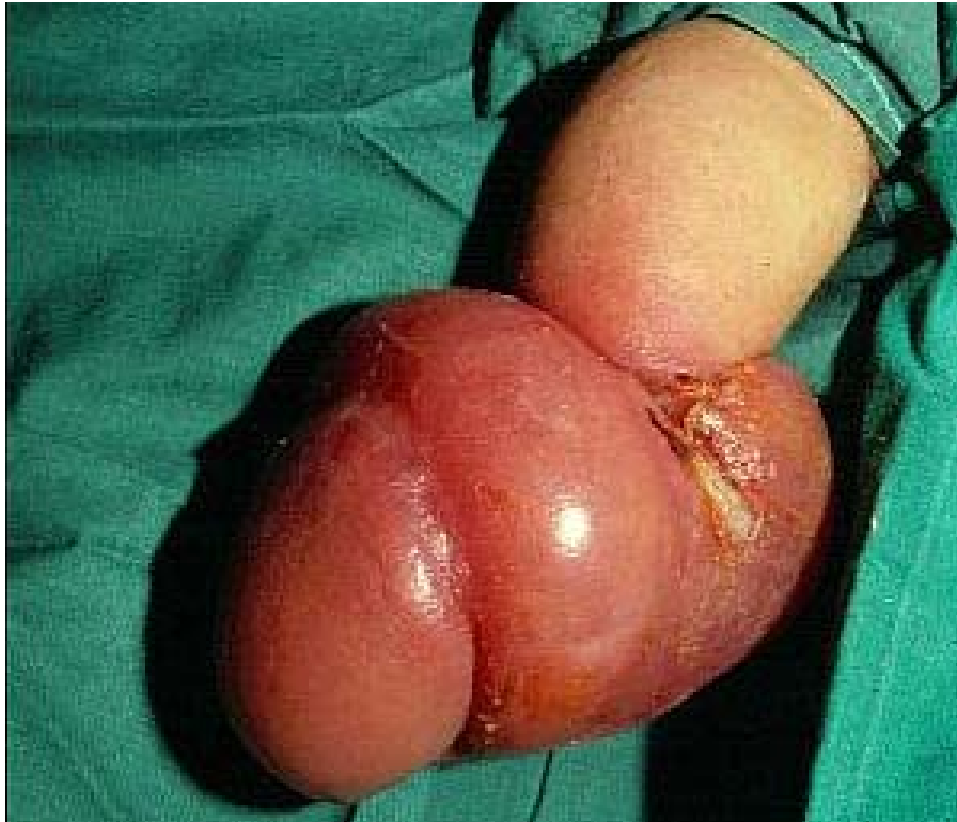

**Fig A** Paraphimosis

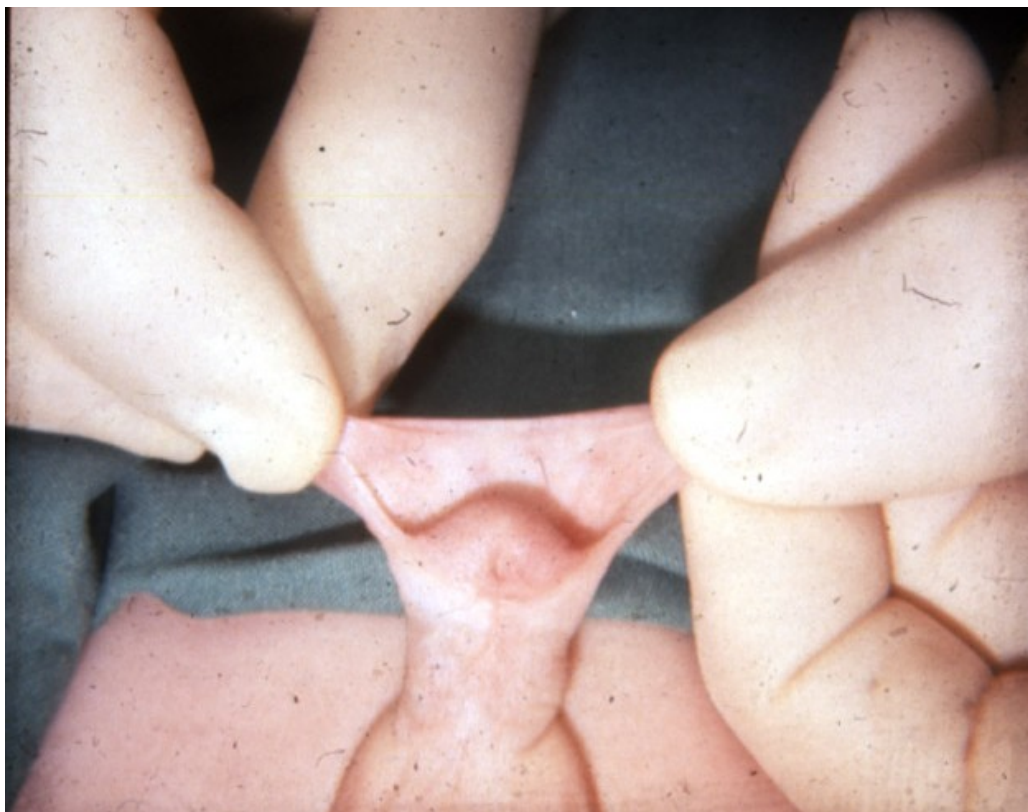

**Fig b** Minor hypospadias with hooded foreskin

Supplement: bmj_335_7631_1206__1.pdf [file bmj_335_7631_1206__1.pdf]
